# Supplementary material for: SARS-CoV-2 Innate Effector Associations and Viral Load in Early Nasopharyngeal Infection
Source: bioRxiv or medRxiv preprint supplement (doi:10.1101/2020.10.30.20223545), 2020-11-04
Supplement: Supplementary file [file media-2.pdf]

Supplementary Table 2a. Correlations among measured protein biomarkers.\*

|                     |                                  |              |                                |                              |                               |                                 |                                  |                              |             |            |             |                |             |
|---------------------|----------------------------------|--------------|--------------------------------|------------------------------|-------------------------------|---------------------------------|----------------------------------|------------------------------|-------------|------------|-------------|----------------|-------------|
| Protein, log(pg/ml) | <b>IFN<math>\alpha</math>2</b>   | -            |                                |                              |                               |                                 |                                  |                              |             |            |             |                |             |
|                     | <b>IFN<math>\beta</math></b>     | 0.33         | <b>0.7</b>                     |                              |                               |                                 |                                  |                              |             |            |             |                |             |
|                     | <b>IFN<math>\gamma</math></b>    | 0.35         | <b>0.72</b>                    | <b>0.62</b>                  |                               |                                 |                                  |                              |             |            |             |                |             |
|                     | <b>IFN<math>\lambda</math>1</b>  | -            | -                              | -                            | -                             |                                 |                                  |                              |             |            |             |                |             |
|                     | <b>IFN<math>\lambda</math>23</b> | 0.33         | <b>0.53</b>                    | 0.46                         | <b>0.63</b>                   | -                               |                                  |                              |             |            |             |                |             |
|                     | <b>IL1<math>\beta</math></b>     | -            | <b>0.61</b>                    | 0.35                         | 0.42                          | -                               | 0.36                             |                              |             |            |             |                |             |
|                     | <b>IL6</b>                       | -            | -                              | 0.32                         | -                             | -                               | -                                | -                            |             |            |             |                |             |
|                     | <b>IL8</b>                       | -            | -                              | -                            | -                             | -                               | -                                | -                            | 0.4         |            |             |                |             |
|                     | <b>IL10</b>                      | -            | -                              | -                            | -                             | -                               | -                                | -                            | 0.37        | -          |             |                |             |
|                     | <b>IL12p70</b>                   | -0.33        | -                              | -                            | -                             | <b>0.52</b>                     | -                                | -                            | -           | -          | 0.45        |                |             |
|                     | <b>IP10</b>                      | -            | -                              | -                            | -                             | -                               | -                                | -                            | <b>0.57</b> | 0.38       | 0.4         | -              |             |
|                     | <b>TNF<math>\alpha</math></b>    | -            | -                              | -                            | -                             | -                               | -                                | -                            | -           | -          | -           | -              | -           |
|                     |                                  | <b>GMCSF</b> | <b>IFN<math>\alpha</math>2</b> | <b>IFN<math>\beta</math></b> | <b>IFN<math>\gamma</math></b> | <b>IFN<math>\lambda</math>1</b> | <b>IFN<math>\lambda</math>23</b> | <b>IL1<math>\beta</math></b> | <b>IL6</b>  | <b>IL8</b> | <b>IL10</b> | <b>IL12p70</b> | <b>IP10</b> |
|                     | Protein, log(pg/ml)              |              |                                |                              |                               |                                 |                                  |                              |             |            |             |                |             |

Supplementary Table 2b. Correlations between measured Proteins and mRNA biomarkers.\*

|                        |                                 |              |                                |                              |                               |                                 |                                  |                              |            |            |             |                |             |
|------------------------|---------------------------------|--------------|--------------------------------|------------------------------|-------------------------------|---------------------------------|----------------------------------|------------------------------|------------|------------|-------------|----------------|-------------|
| mRNA, log(Fold-Change) | <b>GMCSF</b>                    | -            | -                              | -                            | -                             | -                               | -                                | -                            | -          | -          | -           | -              | -           |
|                        | <b>IFN<math>\alpha</math>2</b>  | -            | -                              | -                            | -                             | 0.32                            | -                                | -                            | -          | -          | 0.33        | -              | -           |
|                        | <b>IFN<math>\beta</math>1</b>   | -            | -                              | -                            | -                             | -                               | -                                | -                            | -          | -          | 0.33        | -              | -           |
|                        | <b>IFN<math>\gamma</math></b>   | -            | -                              | -                            | -                             | -                               | -                                | -                            | -          | -          | -           | -              | -           |
|                        | <b>IFN<math>\lambda</math>1</b> | -            | -                              | -                            | -                             | -                               | -                                | -                            | -          | -          | -           | 0.49           | -           |
|                        | <b>IFN<math>\lambda</math>2</b> | -            | -                              | -                            | -                             | -                               | -                                | -                            | -          | -          | -           | 0.36           | -           |
|                        | <b>IFN<math>\lambda</math>3</b> | -            | -                              | -                            | -                             | -                               | -                                | -                            | -          | -          | -           | -              | -           |
|                        | <b>IL6</b>                      | -            | -                              | -                            | -                             | -                               | -                                | -                            | -          | -          | -           | -0.34          | -           |
|                        | <b>IL8</b>                      | -            | -                              | -                            | -                             | -                               | -                                | -                            | -          | -          | -           | -              | -           |
|                        | <b>IL10</b>                     | -            | -0.5                           | -0.44                        | -0.46                         | -                               | <b>-0.65</b>                     | -                            | -          | -          | -           | -              | -           |
|                        | <b>IP10</b>                     | -            | -                              | -                            | -0.35                         | -                               | -0.32                            | -                            | 0.45       | -          | -           | <b>0.61</b>    | -           |
|                        | <b>TNF<math>\alpha</math></b>   | -            | -0.37                          | -                            | -0.33                         | -                               | <b>-0.54</b>                     | -                            | -          | -          | -           | -              | -           |
|                        |                                 | <b>GMCSF</b> | <b>IFN<math>\alpha</math>2</b> | <b>IFN<math>\beta</math></b> | <b>IFN<math>\gamma</math></b> | <b>IFN<math>\lambda</math>1</b> | <b>IFN<math>\lambda</math>23</b> | <b>IL1<math>\beta</math></b> | <b>IL6</b> | <b>IL8</b> | <b>IL10</b> | <b>IL12p70</b> | <b>IP10</b> |
|                        | Protein, log(pg/ml)             |              |                                |                              |                               |                                 |                                  |                              |            |            |             |                |             |

Supplementary Table 2c. Correlations among measured mRNA biomarkers.\*

|                        |                                 |                        |                                |                               |                               |                                 |                                 |                                 |            |            |             |             |  |
|------------------------|---------------------------------|------------------------|--------------------------------|-------------------------------|-------------------------------|---------------------------------|---------------------------------|---------------------------------|------------|------------|-------------|-------------|--|
| mRNA, log(Fold-Change) | <b>IFN<math>\alpha</math>2</b>  | -                      |                                |                               |                               |                                 |                                 |                                 |            |            |             |             |  |
|                        | <b>IFN<math>\beta</math>1</b>   | -                      | <b>1.00</b>                    |                               |                               |                                 |                                 |                                 |            |            |             |             |  |
|                        | <b>IFN<math>\gamma</math></b>   | 0.33                   | <b>0.52</b>                    | <b>0.5</b>                    |                               |                                 |                                 |                                 |            |            |             |             |  |
|                        | <b>IFN<math>\lambda</math>1</b> | -                      | <b>0.52</b>                    | <b>0.52</b>                   | 0.45                          |                                 |                                 |                                 |            |            |             |             |  |
|                        | <b>IFN<math>\lambda</math>2</b> | -                      | <b>0.53</b>                    | <b>0.52</b>                   | <b>0.59</b>                   | <b>0.86</b>                     |                                 |                                 |            |            |             |             |  |
|                        | <b>IFN<math>\lambda</math>3</b> | -                      | 0.44                           | 0.44                          | 0.47                          | <b>0.6</b>                      | <b>0.76</b>                     |                                 |            |            |             |             |  |
|                        | <b>IL6</b>                      | <b>0.55</b>            | <b>0.6</b>                     | <b>0.59</b>                   | <b>0.45</b>                   | -                               | 0.34                            | <b>0.53</b>                     |            |            |             |             |  |
|                        | <b>IL8</b>                      | 0.4                    | 0.4                            | 0.39                          | 0.33                          | -                               | -                               | -                               |            |            |             |             |  |
|                        | <b>IL10</b>                     | 0.48                   | -                              | -                             | 0.4                           | -                               | 0.33                            | -                               | -          | 0.33       |             |             |  |
|                        | <b>IP10</b>                     | -                      | -                              | -                             | -                             | 0.34                            | 0.36                            | -                               | -          | <b>0.6</b> | 0.5         |             |  |
|                        | <b>TNF<math>\alpha</math></b>   | 0.43                   | -                              | -                             | -                             | -                               | -                               | -                               | -          | 0.38       | <b>0.77</b> | 0.47        |  |
|                        |                                 | <b>GMCSF</b>           | <b>IFN<math>\alpha</math>2</b> | <b>IFN<math>\beta</math>1</b> | <b>IFN<math>\gamma</math></b> | <b>IFN<math>\lambda</math>1</b> | <b>IFN<math>\lambda</math>2</b> | <b>IFN<math>\lambda</math>3</b> | <b>IL6</b> | <b>IL8</b> | <b>IL10</b> | <b>IP10</b> |  |
|                        |                                 | mRNA, log(Fold-Change) |                                |                               |                               |                                 |                                 |                                 |            |            |             |             |  |

\*Spearman Correlations with  $p < 0.001$  shown in **Bold Type**,  $0.001 \leq p < 0.01$  in Regular Type and  $0.01 \leq p < 0.05$  in Grey Type, with  $p \geq 0.05$  not shown. Dashes mark non-significant results. Grey Boxes mark self-correlations or duplicate conditions.
