# Supplementary material for: SARS-CoV-2 Innate Effector Associations and Viral Load in Early Nasopharyngeal Infection
Source: bioRxiv or medRxiv preprint supplement (doi:10.1101/2020.10.30.20223545), 2020-11-04
Supplement: Supplementary file [file media-3.pdf]

## Supplementary Figure Legends

**Supplementary Figure 1. Relationships with Age.** In **a.** male patients were older and in **b.** patients without infection were older, but in **c.** this relationship is seen to be limited to male patients (see also Supplementary Table 1c).

**Supplementary Figure 2. SARS-CoV-2 Infection and Signaling Protein Transcription.** There was no relationship between *TBKI* mRNA transcription and **a.** infection status or **b.** viral *NI* protein transcripts. There was also no relationship between *STING1* mRNA transcription and **c.** infection status or **d.** viral *NI* protein mRNA.
