# Supplementary material for: SARS-CoV-2 Innate Effector Associations and Viral Load in Early Nasopharyngeal Infection
Source: bioRxiv or medRxiv preprint supplement (doi:10.1101/2020.10.30.20223545), 2020-11-04

## Supplementary Figure 2

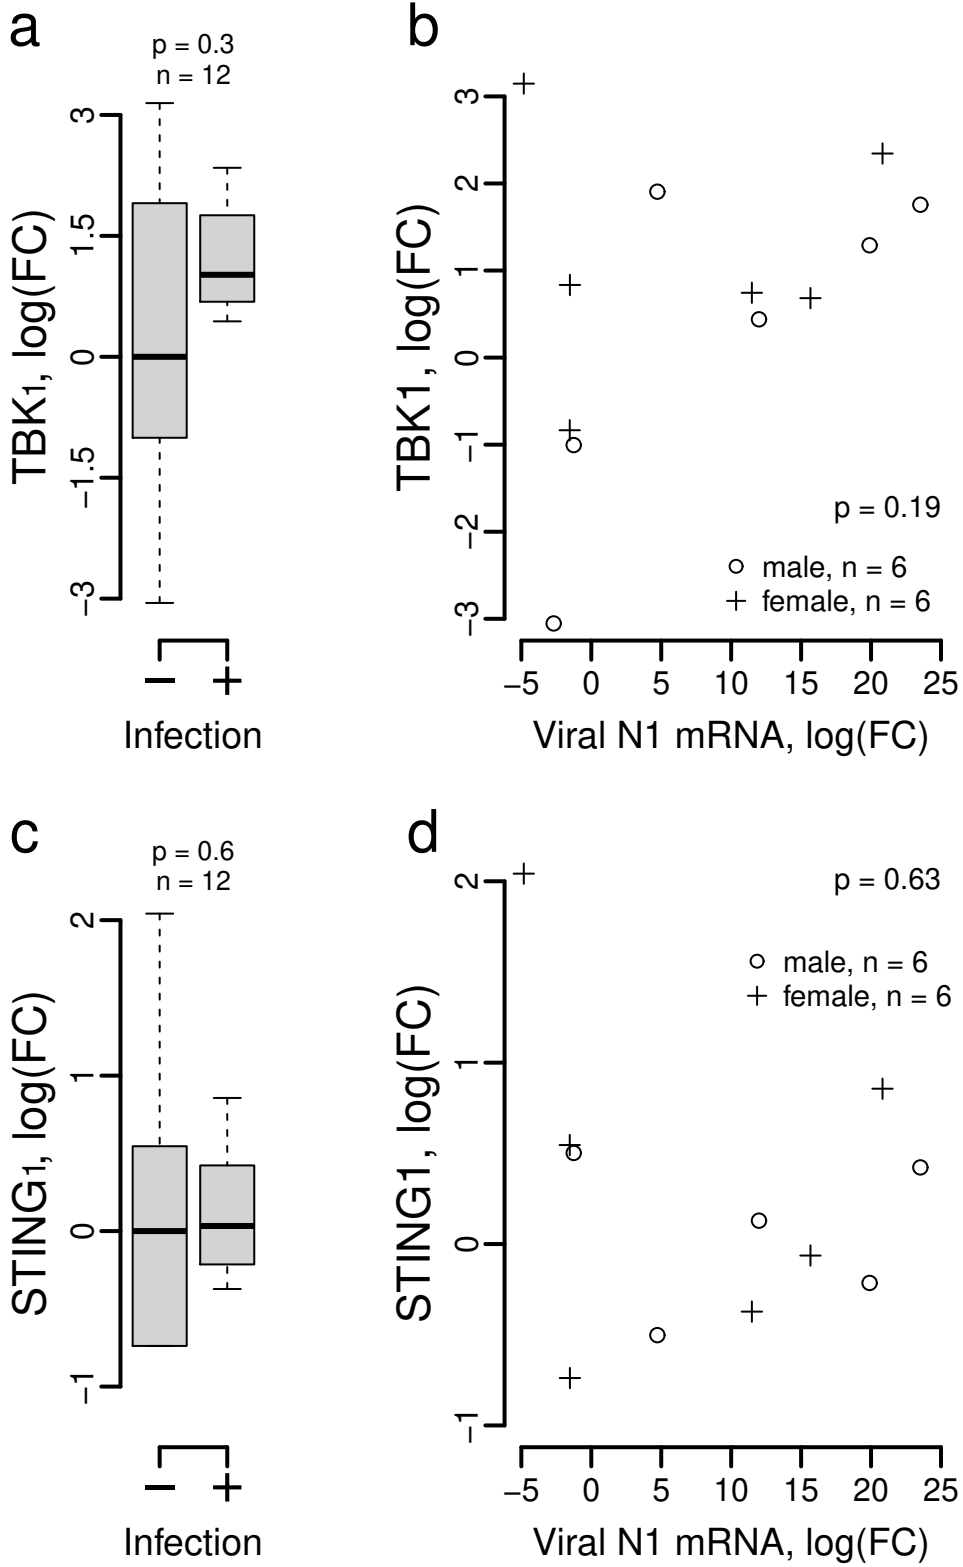

Supplement: Supplementary file [file media-5.pdf]
